# Supplementary material for: Heat-guided drug delivery via thermally induced crosslinking of polymeric micelles
Source: PubMed Central journal article supplement — Commun Chem. 2024 Dec 3;7:287. doi: 10.1038/s42004-024-01383-0 (PMC11615195; doi:10.1038/s42004-024-01383-0), 2024-12-03
Supplement: 42004_2024_1383_MOESM3_ESM.pdf [file 42004_2024_1383_MOESM3_ESM.pdf]

# Description of Additional Supplementary Files

**File name:** Supplementary Data

**Description:** Raw data for manuscript figures
